# Supplementary material
Source: PubMed Central journal article supplement (PMC1986623)

**A**

Absorbance at 360 nm [mAu]

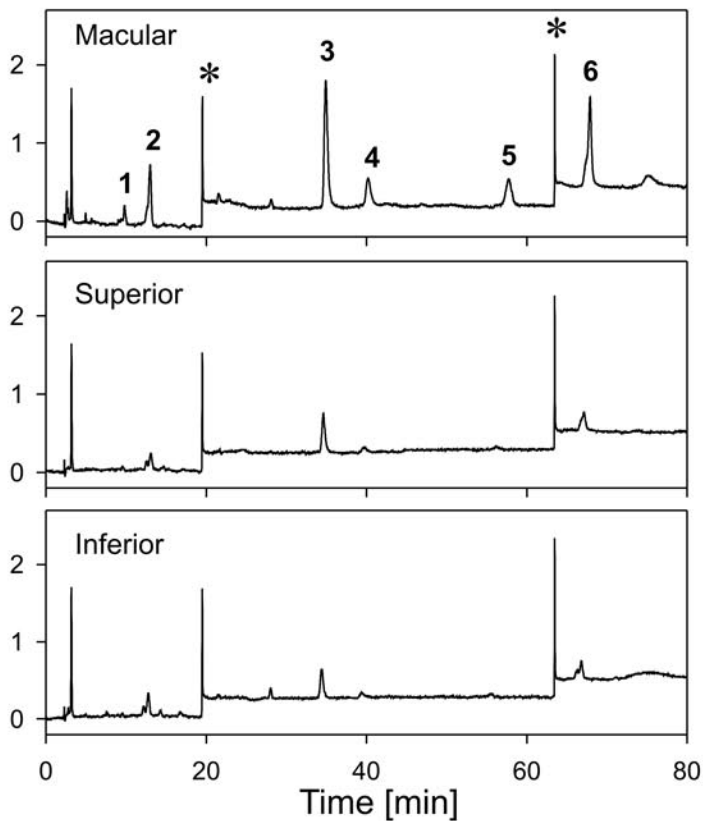**B**

Distribution of retinoids [%]

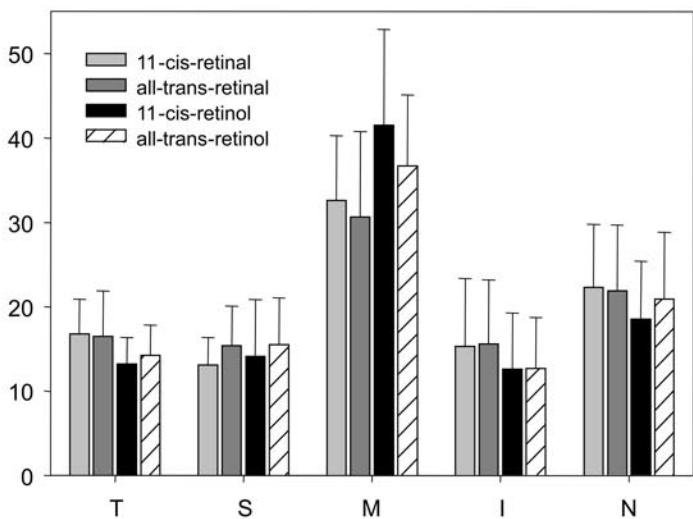

Supplement: pnas_0706367104_1.pdf [file pnas_0706367104_1.pdf]
